# Supplementary material
Source: publisher site journal article supplement (https://www.dovepress.com/article/423586)
Supplement: Supplementary file 1 [file get_supplementary_file.php]

**Appendix 1: Examples of elaboration occurrences according to the task**

| Teaching (experience and tips sharing) related to the task | SV 309_COM_PSY: No, you didn't have your arms crossed, you had your arms like that, which is a sign of hierarchy, of superiority in relation to the patient. So he will feel a little attacked, and then he will go up accordingly or he will be directly defensive. So, he will try to argue very quickly to get what he wants, as he will be already in a position where he is defensive and a certain level of aggressive energy.  SV 160_CollaboIP_Med_Int: Sometimes, there are situations that are less clear, where the nurse is worried. I think it's our role to validate this concern and to see what's going on. Even if on the phone it's not as serious as that, like septic shock. |
| --- | --- |
| Teaching physician roles/professionalism | SV 344_Comm_MEDINT: It's always something that confronts us with our personal fear and our own feelings and it's true that we have to do it, because in our profession we often do it. But even if we do it a lot of times, often we never manage to get used to it.  SV 308_CollaboIP_Gyn_Obs: In an emergency situation, you're a bit of a pillar in the middle of the storm. You’re not allowed to panic. That's what you're going to learn throughout your training. And make the decisions and be clear enough about recognizing the emergency so you can make the right decisions. And reassure your colleagues that you understand the situation.  SV 316_ExaPhys_PED: Everyone hates being contradicted by the person that shows up after. You can simply say "I think that way but I don't have enough years of experience for that, so I'll ask”. : In that way, the patient won't hold it against you. You admit that you don't know everything and you don't pretend to know everything. People prefer that. |
| Teaching clinical reasoning | SV 170_CollaboIP_MedInt: Because you have an initial hypothesis that was septic shock or sepsis that you immediately put aside. At this point I'm not saying that she's right or you're wrong, but you were still in the phase where you couldn't exclude the two things because you know very well that you can have digestive hemorrhages and at the same time have a bacterial translocation. Besides, we put you on antibiotics in the case of bleeding from XXX.  SV 270_Collabo_IP_GynObs: - she was at 4 cm - but was she fully dilated? Now, she's bleeding, depending on the amount of blood, is the baby already engaged, you can deliver her, instrument her, or is this a catastrophic and outdated situation. Because the lady is not fully dilated, and the baby is not engaged and you have no choice but to do a cesarean. |
| Teaching theoretical concepts | SV 309_COMM_PSY: There are two types of languages in communication, I don't know if you know. There is the digital language and the analogical language. The digital language is rather everything that is content, the speech. And the analogical language is rather what is the behavior, the posture. - The general attitude. - Yes the general posture, when I put my hands like this, I am more open. When I put my hands like this I am closed. That's it, that's the analogical language.  SV 902_ExaPhys_MPR: And then, once you have done observation, palpation, amplitudes, internal rotation, external rotation, you test the rotators’ cuff. In general, you do 4 tests, including the lift off, which you do quite well by placing your hands behind her or by asking her to take off or by pushing against your hands. This allows you to see if she can do this movement. And then there are 2 others. |
